# Supplementary material for: Direct SERS detection of contaminants in a complex mixture: rapid, single step screening for melamine in liquid infant formula
Source: Royal Society of Chemistry journal article supplement (doi:10.1039/c2an15846a), 2012-01-01
Supplement: c2an15846a.pdf [file c2an15846a.pdf]

Electronic Supplementary Information (ESI)

## Direct SERS detection of contaminants in a complex mixture: Single step screening for melamine in infant formula

Jordan F. Betz,<sup>a,b</sup> Yi Cheng<sup>b</sup> and Gary W. Rubloff<sup>\*b,c</sup>

<sup>a</sup> Fischell Department of Bioengineering, University of Maryland, College Park, MD, USA.

<sup>b</sup> Institute for Systems Research, University of Maryland, College Park, MD, USA.

<sup>c</sup> Department of Materials Science and Engineering, University of Maryland, College Park, MD, USA.

\* Corresponding author information: Fax: +01 301-314-9920; Tel: +01 301-405-3011; E-mail: rubloff@umd.edu

**a) Micro- and nanostructure growth following Cu tape striations**

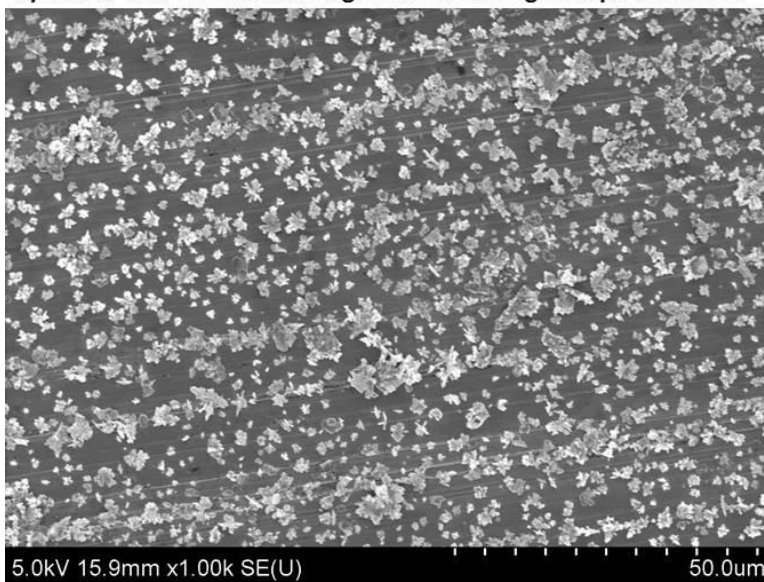

**b) Lower magnification image showing growth along striations**

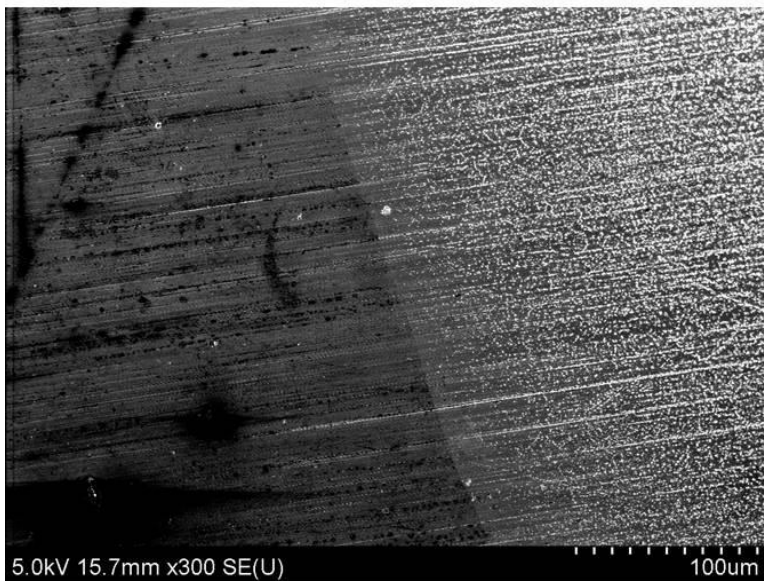

**Supplementary Figure 1** Scanning electron micrographs of the substrate created on Cu tape. Micro- and nanostructure growth is observed to align with the surface striations on the Cu tape which presumably arise during the manufacturing and processing of the tape itself.
